# Supplementary material for: DNA polymerase epsilon interacts with SUVH2/9 to repress the expression of genes associated with meiotic DSB hotspot in Arabidopsis
Source: PubMed Central journal article supplement — Proc Natl Acad Sci U S A. 2022 Oct 3;119(41):e2208441119. doi: 10.1073/pnas.2208441119 (PMC9564942; doi:10.1073/pnas.2208441119), 2022-10-03
Supplement: pnas.2208441119.sapp.pdf [file pnas.2208441119.sapp.pdf]

## Supplementary Information for

DNA polymerase epsilon interacts with SUVH2/9 to repress the  
expression of genes associated with meiotic DSB hotspot in  
*Arabidopsis*

Cong Wang<sup>1</sup>, Jiyue Huang<sup>2</sup>, Jun Zhang<sup>1</sup>, Yue Yu<sup>1</sup>, Gregory P. Copenhaver<sup>3,4</sup>, Chenjiang  
You<sup>1\*</sup> and Yingxiang Wang<sup>1,2\*</sup>

Correspondence: Y.W.: [yx\\_wang@fudan.edu.cn](mailto:yx_wang@fudan.edu.cn); C.Y.: [cjyou@fudan.edu.cn](mailto:cjyou@fudan.edu.cn)

### This PDF file includes:

Figures S1 to S12

Table S1

Legends for Datasets S1 to S2

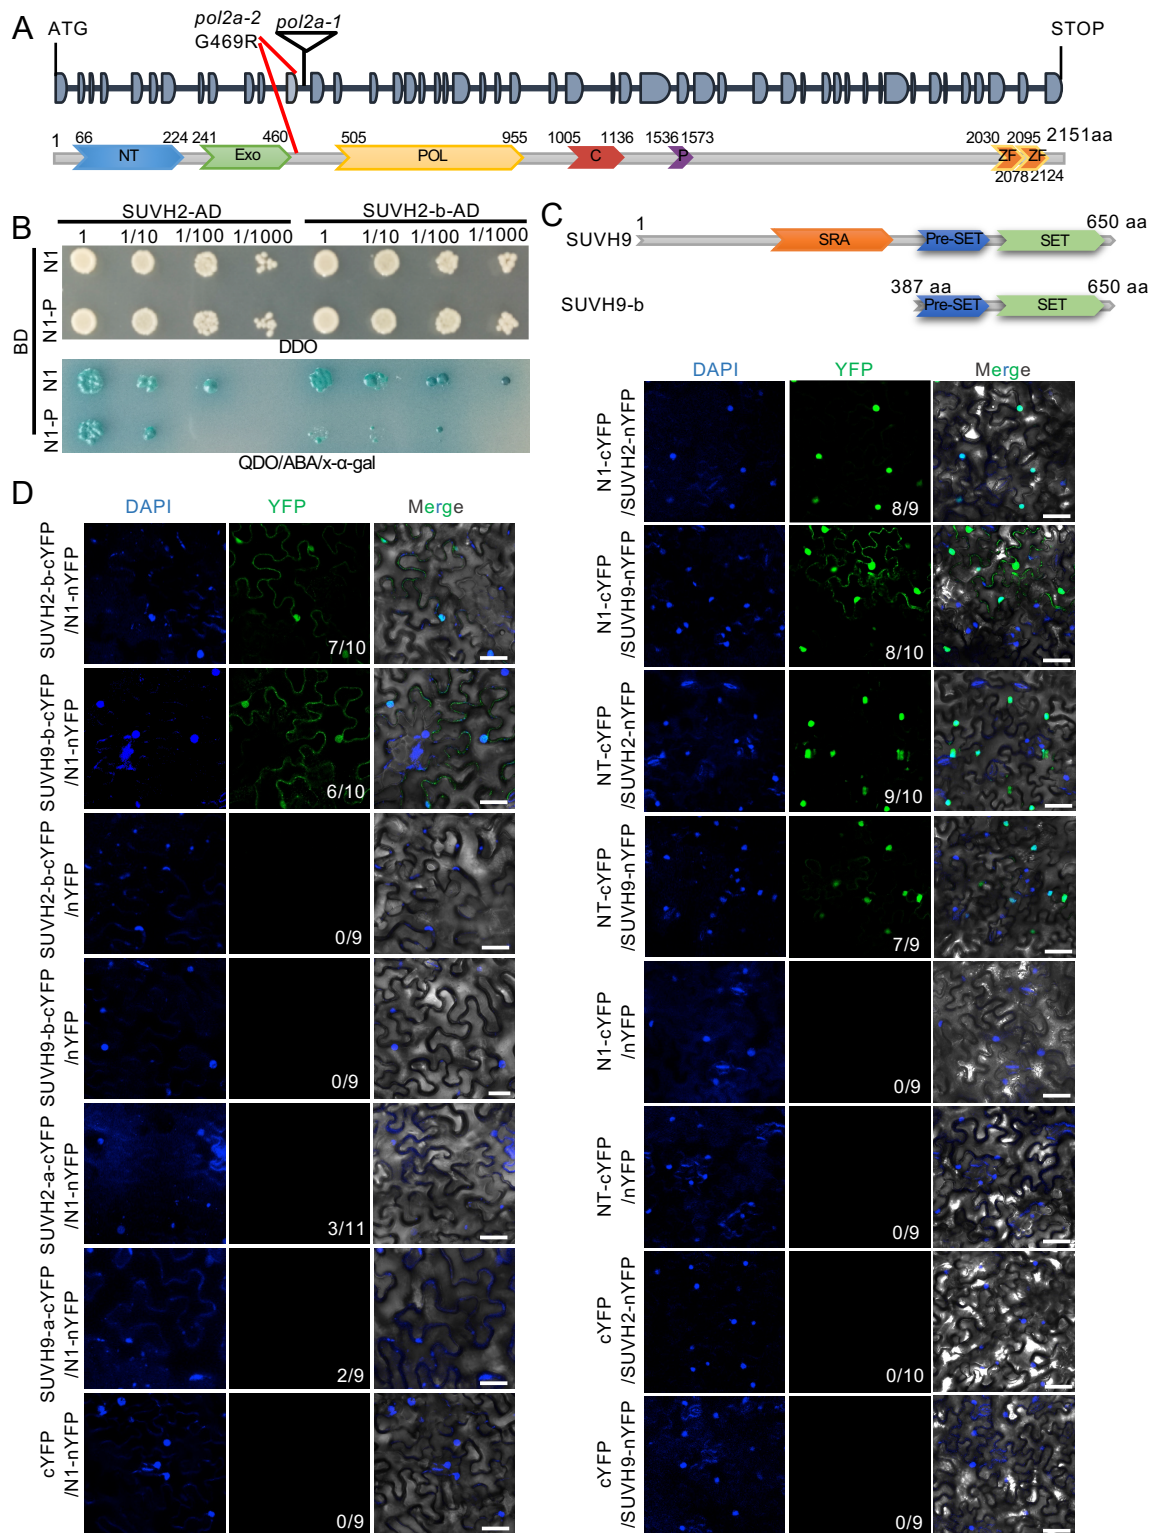

**Fig. S1. The interaction assay between POL2A and SUVH2 or SUVH9**

(A) Diagrams showing the full-length genomic and domain structures of POL2A with the two *pol2a* mutants. *Pol2a-1* with T-DNA insertion in N-terminal 12th intron dramatically decrease the expression of POL2A and *pol2a-2* harboring a point mutation near EXO (exonuclease) domain. (B) Diagrams showing the full-length and truncated forms of SUVH9. (C) Point mutation (*pol2a-2*) of N1 attenuates the interaction with SUVH2, detected by yeast two-hybrid assay using gradient dilution. N1 showing interaction with SUVH2/SUVH2-b at low concentrations “1/100” or “1/1000”, but N1-P not. The initial concentration of “1” means “OD600  $\approx$  0.2”. (D) The interaction between N1/NT of POL2A and SUVH2/SUVH9 or SUVH2-b/SUVH9-b as verified by BiFC assay. At least 3 individual plants are used for infiltration. Numbers in the bottom right corners indicate the number of positive interactions / all leaves for infiltration.

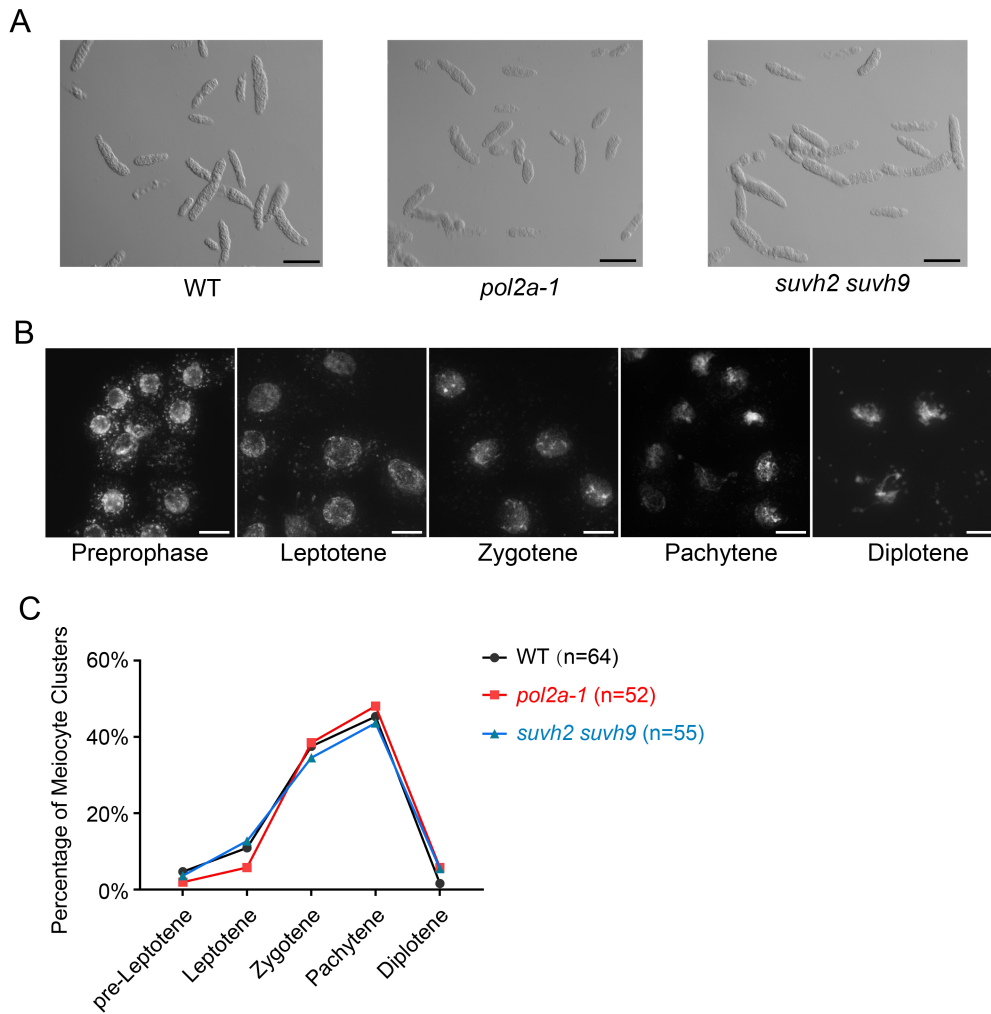

**Fig. S2. Meiotic stage assay of isolated meiocytes from WT, *pol2a-1*, and *suvh2 suvh9***

(A) Male meiocyte clusters isolated from stage 9-10 flower buds from WT, *pol2a-1* and *suvh2 suvh9*. (B) Meiotic chromosome morphology of meiocyte clusters. (C) Percentages of preprophase, leptotene, zygotene, pachytene, and diplotene meiocyte clusters in WT, *pol2a-1*, and *suvh2 suvh9*. Scale bars: a, 100  $\mu$ m, b, 10  $\mu$ m.

A

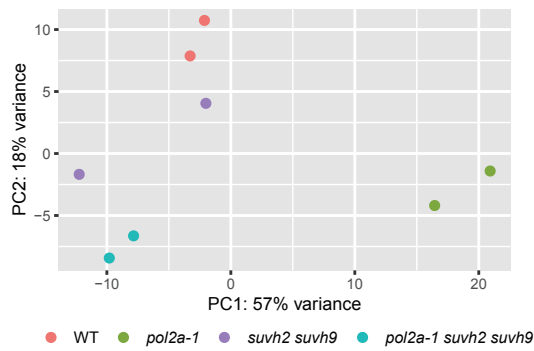

B

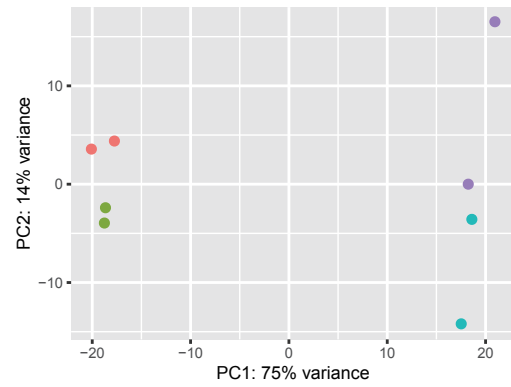

C

UP

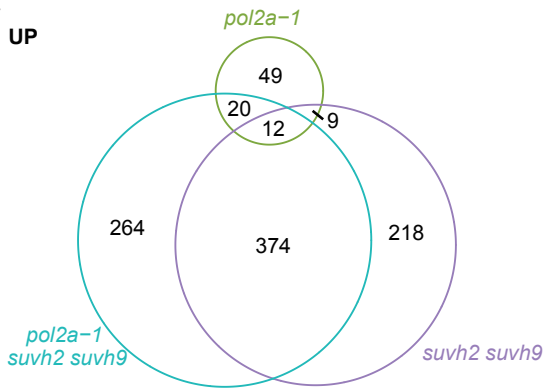

D

DOWN

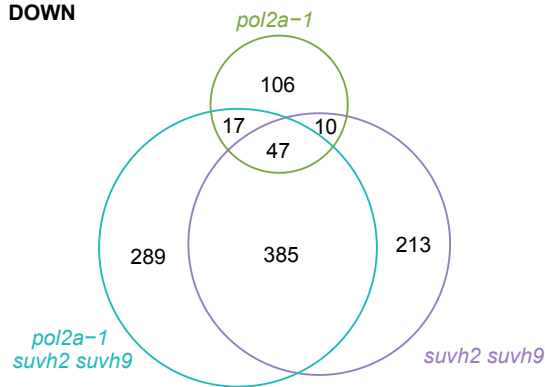

E

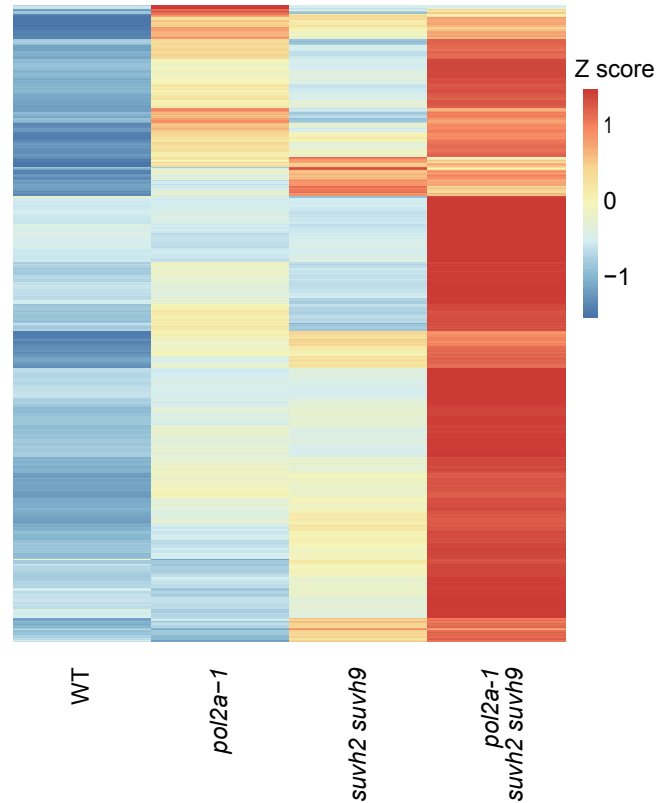

F

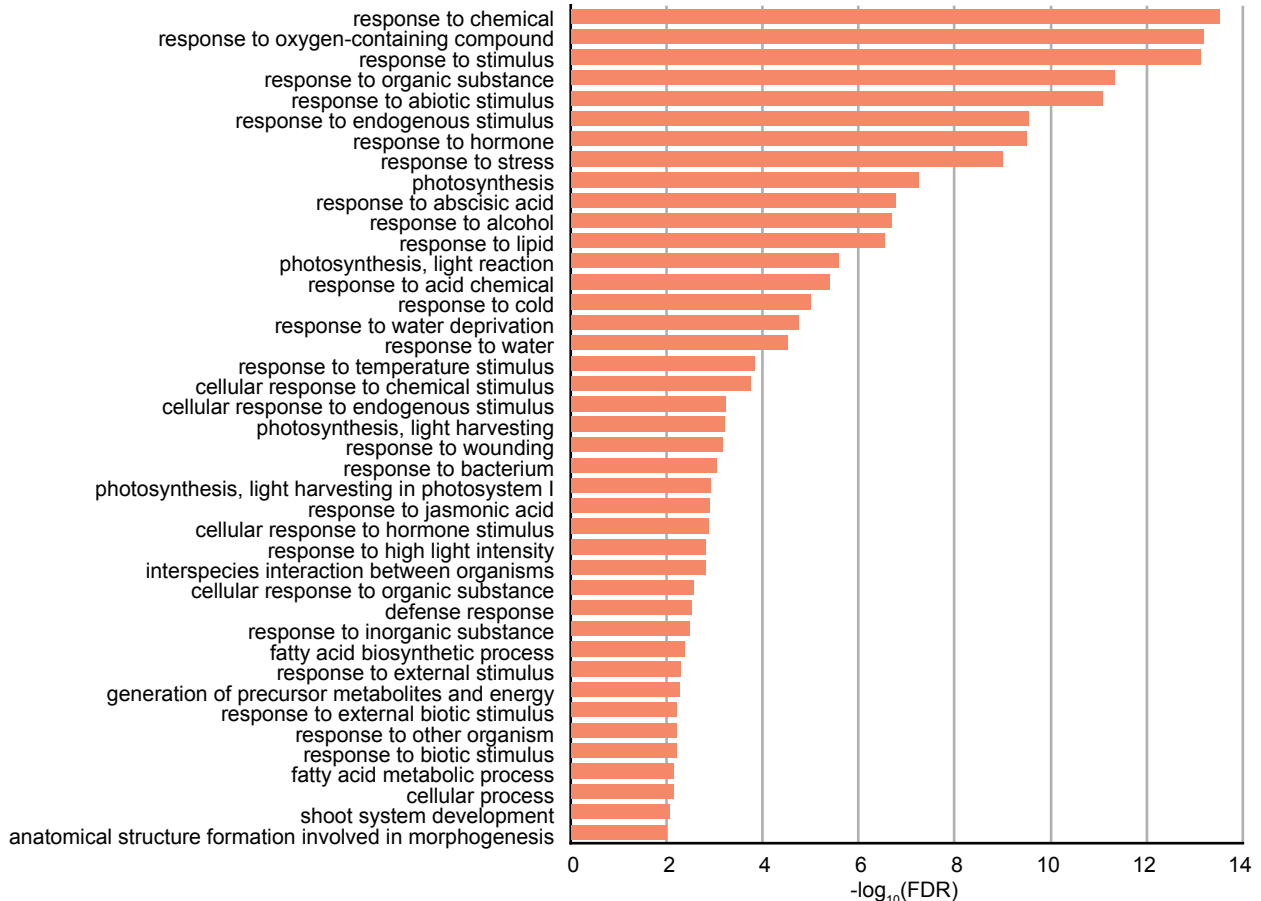

**Fig. S3. Transcription analysis of meiocytes and seedlings in *pol2a-1*, *svh2 svh9* and *pol2a-1 svh2 svh9* mutants.**

(A) PCA results showing the reproducibility of mRNA sequencing data in meiocytes of WT, *pol2a-1*, *svh2 svh9* and *pol2a-1 svh2 svh9*. (B) PCA results showing the reproducibility of mRNA sequencing data of seedlings in WT, *pol2a-1*, *svh2 svh9* and *pol2a-1 svh2 svh9*. (C) Venn diagram showing up-regulated genes in seedlings of each mutant compared to WT. (D) Venn diagram for down-regulated genes in seedlings of each mutant compared to WT. (E) Heatmap for the expression level in FPKM of 865 up-regulated genes of WT and in each mutant. (F) Gene ontology enrichment analysis of 865 up-regulated gene in meiocytes of *pol2a-1 svh2 svh9*.

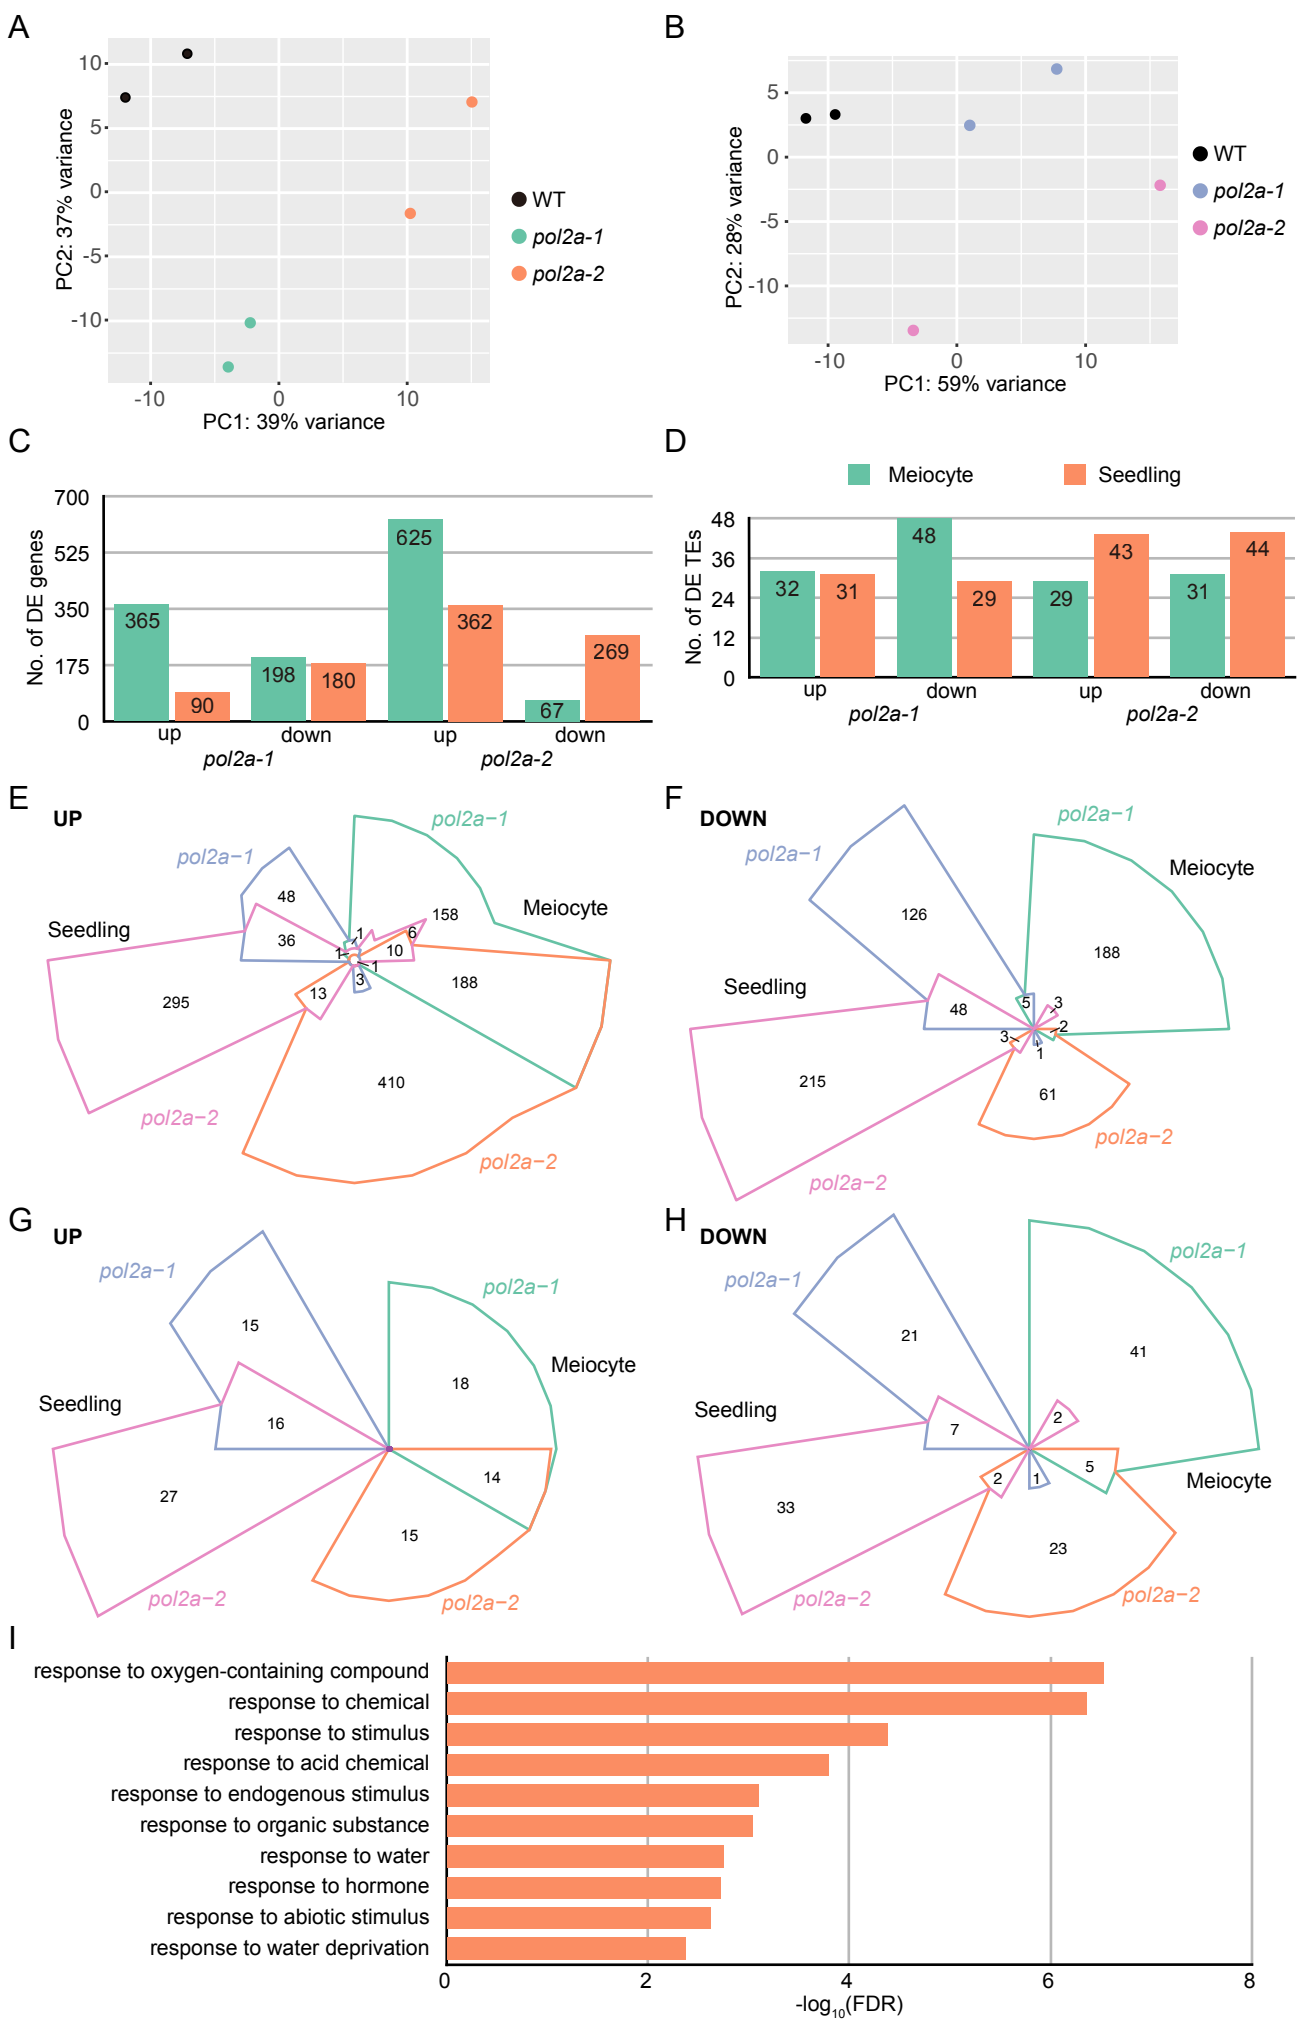

**Fig. S4. Transcription analysis of meiocytes and seedlings in *pol2a* mutants.**

(A) PCA results showing the reproducibility of mRNA sequencing data in meiocytes of WT, *pol2a-1* and *pol2a-2*. (B) PCA results showing the reproducibility of mRNA sequencing data of seedlings in WT, *pol2a-1* and *pol2a-2*. (C) Bar plot showing DEGs in meiocytes and seedlings of *pol2a-1* and *pol2a-2* compared to WT. (D) Diagram showing DE TEs in meiocytes and seedlings of *pol2a-1* and *pol2a-2* compared to WT. (E) Venn diagram for up-regulated genes in meiocytes and seedlings of *pol2a-1* and *pol2a-2* compared to WT. (F) Venn diagram for down-regulated genes in meiocytes and seedlings of *pol2a-1* and *pol2a-2* compared to WT. (G) Venn diagram for up-regulated TEs in meiocytes and seedlings of *pol2a-1* and *pol2a-2* compared to WT. (H) Venn diagram for down-regulated TEs in meiocytes and seedlings of *pol2a-1* and *pol2a-2* compared to WT. (I) Gene ontology enrichment analysis of all up-regulated gene in meiocytes of *pol2a-1* and *pol2a-2*.

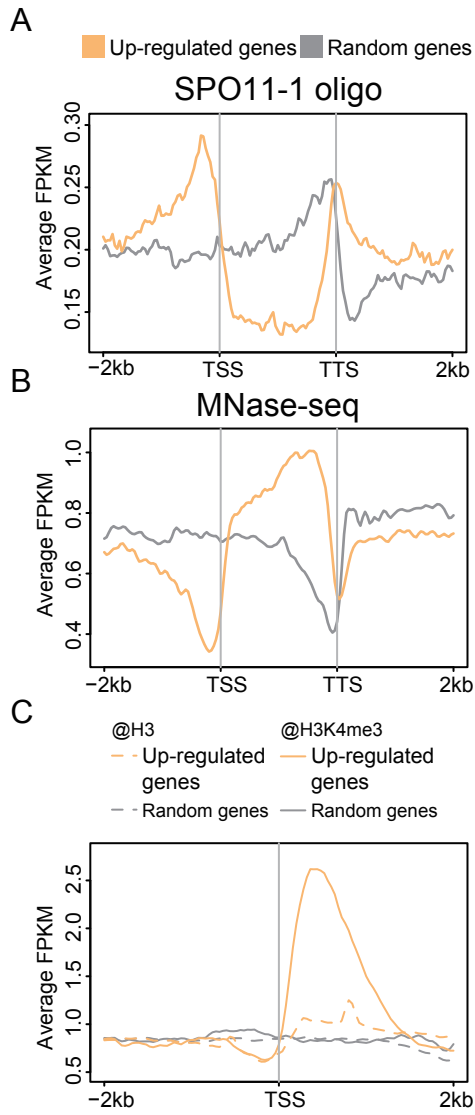

**Fig. S5. The 865 up-regulated genes by POL2A-SUVH2/9 have features of meiotic DSB hotspots**  
 (A-B) Density of SPO11-1 oligos (A) and nucleosome occupancy (B) around the 865 genes upregulated in WT. (C)  
 Distribution of H3K4me3 along the 865 upregulated genes and random genes in WT.



A

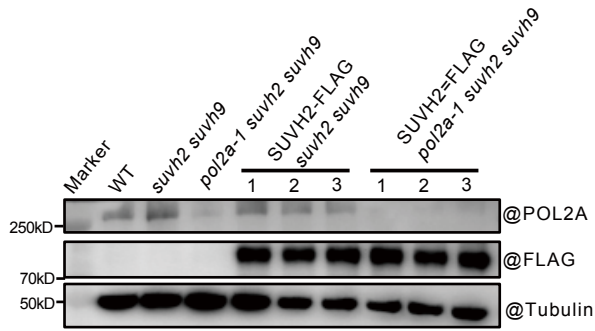

B

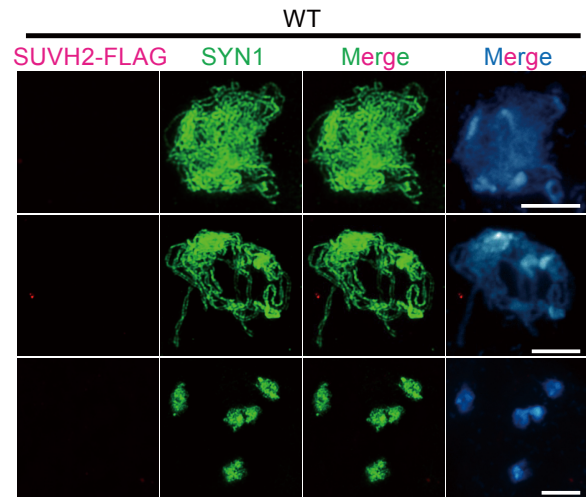

**Fig. S6. The endogenous expression of SUVH2-FLAG in transgenic plants.**

(A) Immunoblotting to measure SUVH2-FLAG expression of inflorescences in *suvh2 suvh9* and *pol2a-1 suvh2 suvh9* backgrounds using the FLAG antibody. Each replicate is the proteins extracted from inflorescences of one individual plant. Tubulin is used as a loading control and POL2A indicates its endogenous expression in each plant. (B) Immunostaining of FLAG and SYN1 in WT is used as a negative control. Scale bars: 5  $\mu$ m.

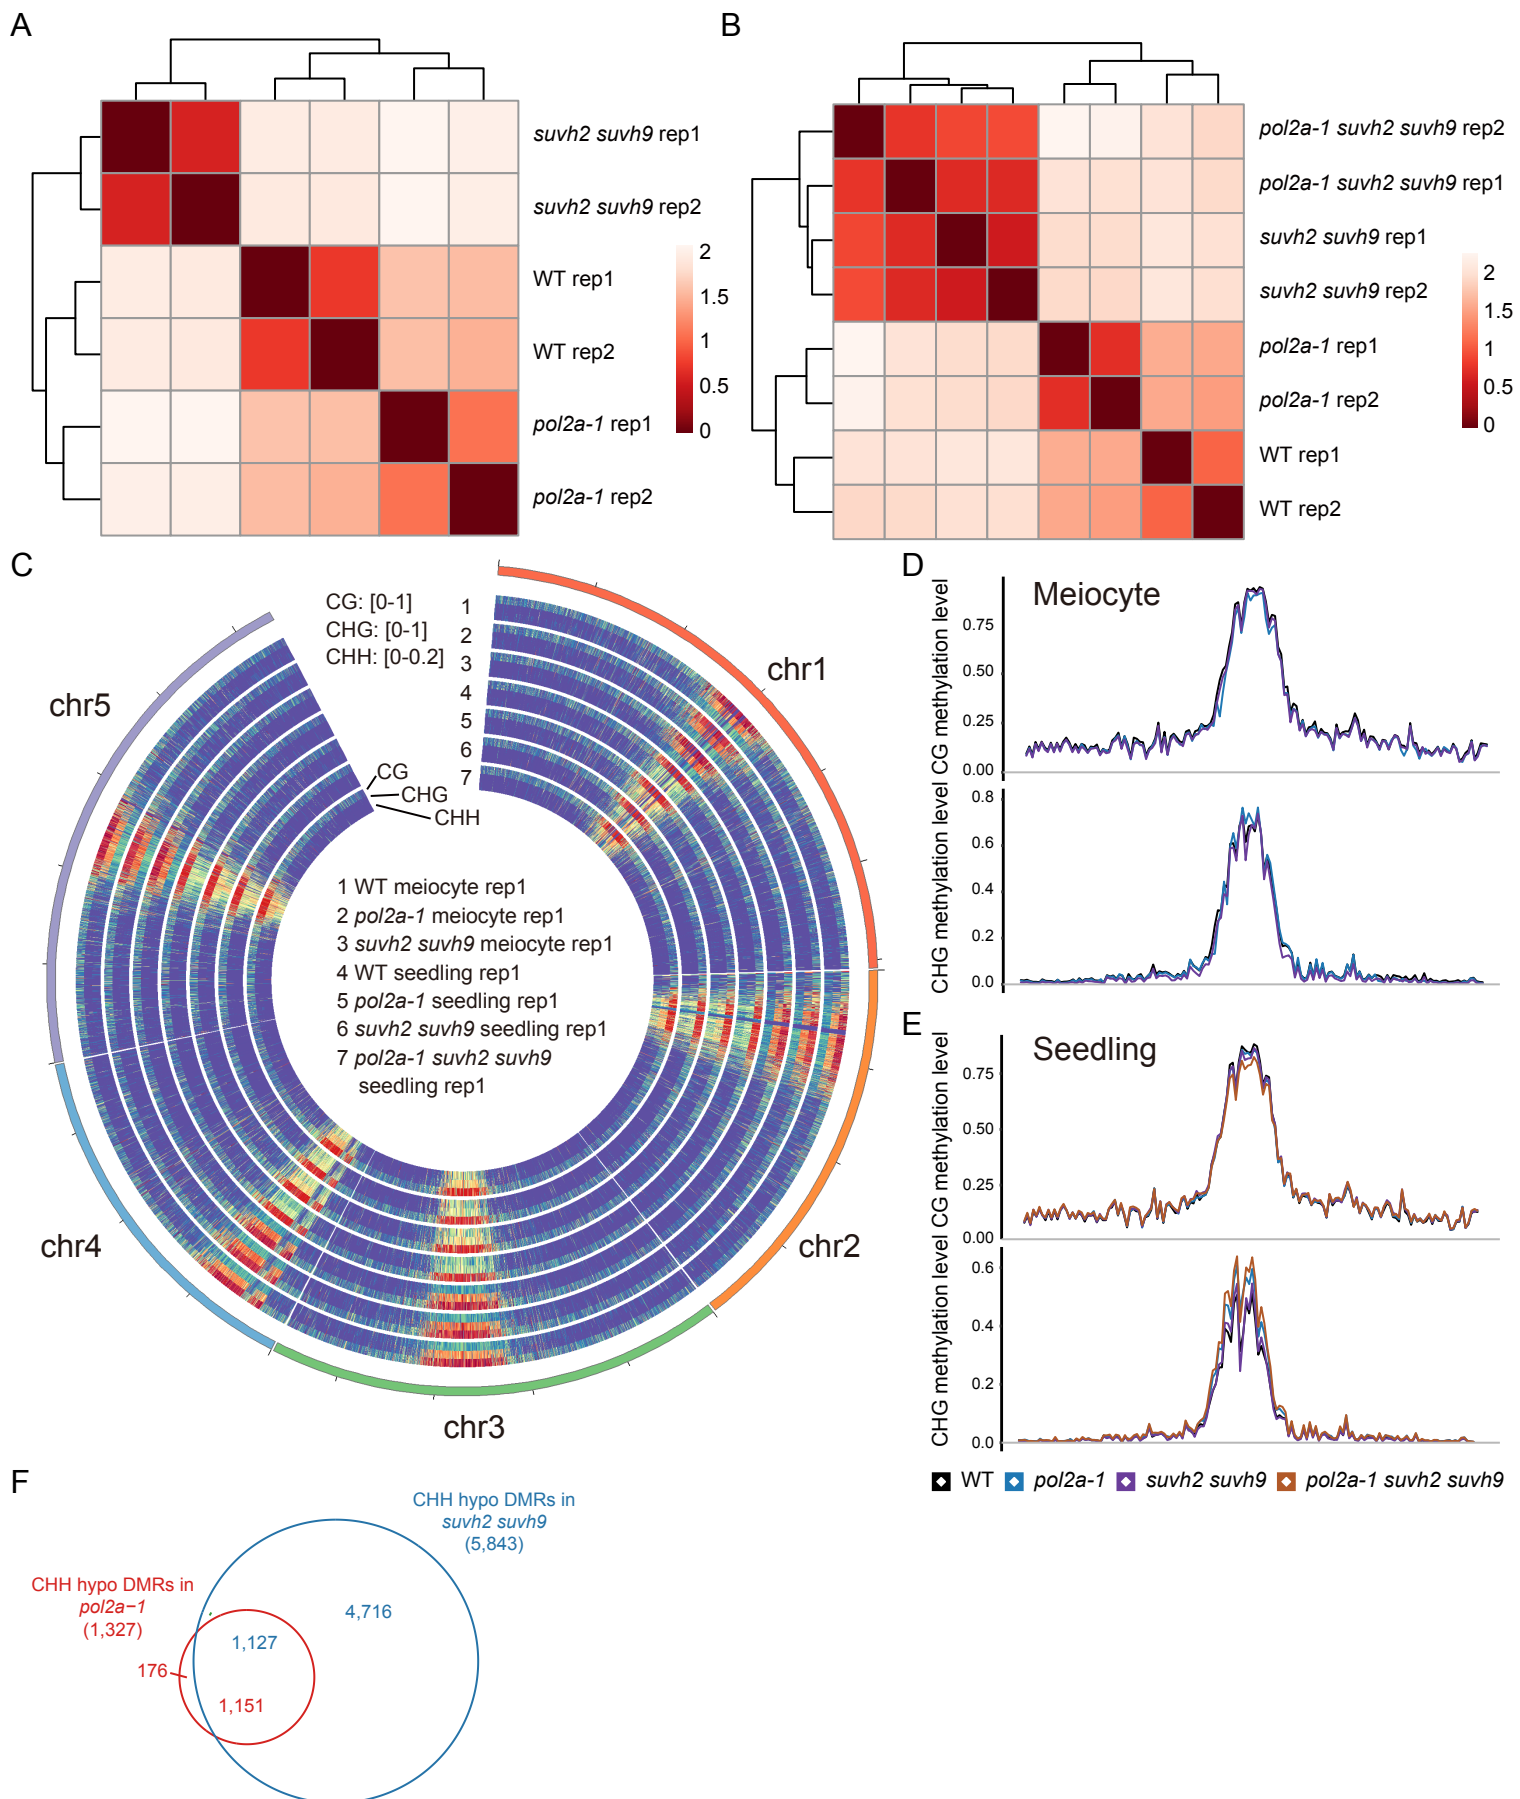

**Fig. S7. DNA methylation profiles in meiocytes and seedlings**

(A) Distance matrix of global DNA methylation levels showing the repeatability of in two biological replicates in meiocytes of WT, *pol2a-1*, and *suvh2 suvh9*. (B) Distance matrix of global DNA methylation levels showing the repeatability of in two biological replicates in seedlings of WT, *pol2a-1*, *suvh2 suvh9* and *pol2a-1 suvh2 suvh9*. (C) A circos plot showing the DNA methylation landscape for all three contexts in both meiocytes and seedlings of WT, *pol2a-1*, and *suvh2 suvh9*, and also in seedlings of *pol2a-1 suvh2 suvh9*. (D-E) The DNA methylation profiles of chromosome 1 in the CG and CHG contexts in meiocytes (D) and seedlings (E) of WT (black), *pol2a-1* (blue), *suvh2 suvh9* (purple) and *pol2a-1 suvh2 suvh9* (brown). (F) Venn diagram showing the CHH hypo DMRs in *pol2a-1*, and *suvh2 suvh9* compared to WT. Most POL2A-regulated hypomethylated regions are also hypomethylated in *suvh2 suvh9*.

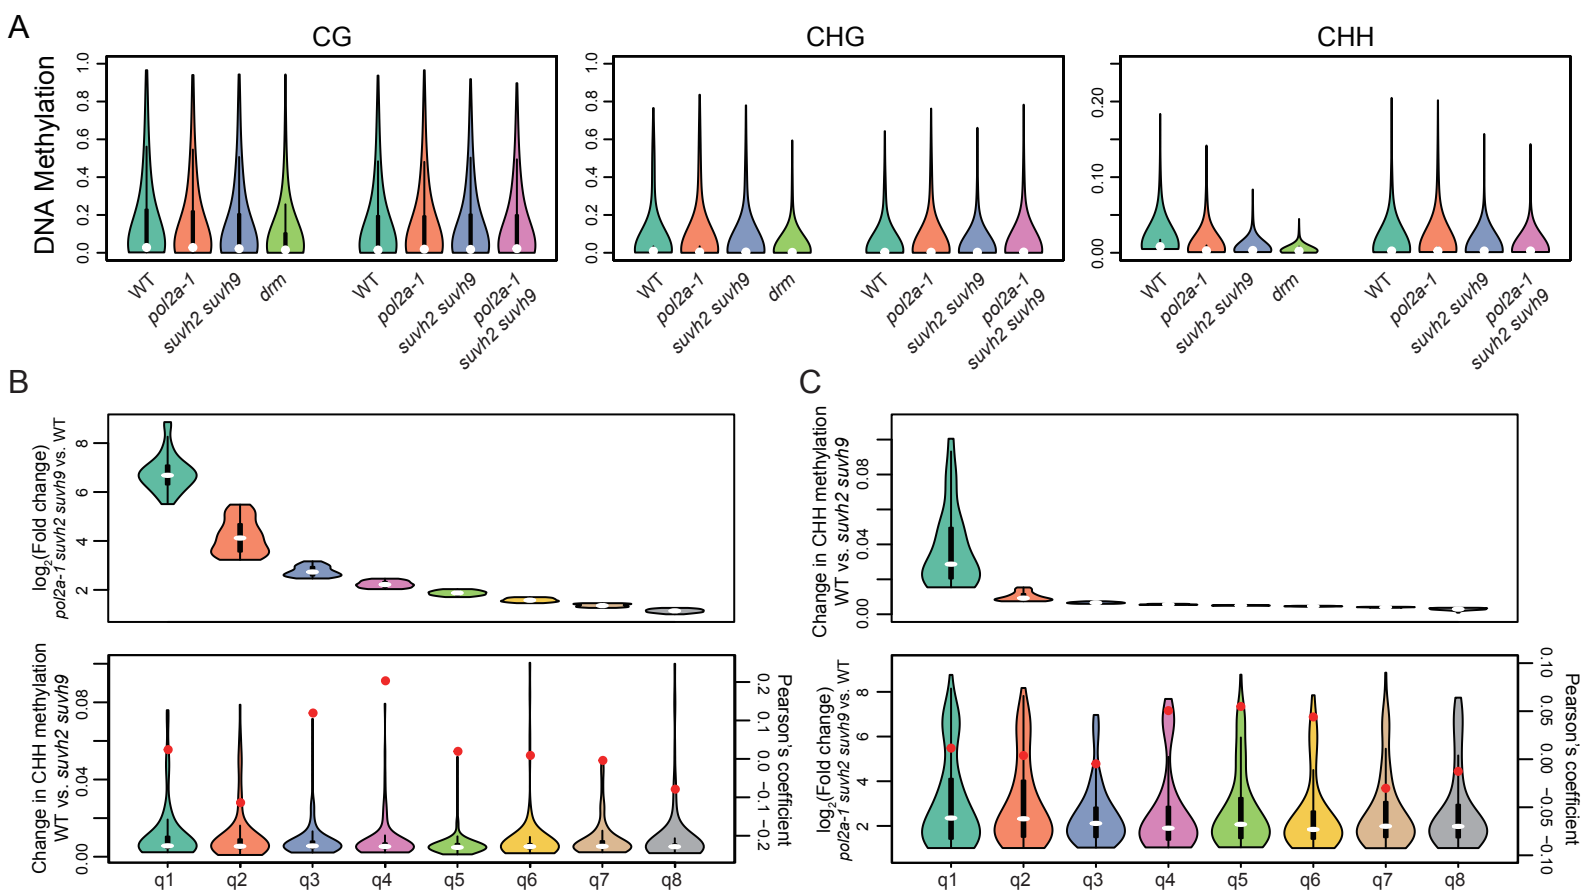

**Fig. S8. CHH methylation on 865 up-regulated genes is not positively correlated with their expression.**

(A) Violin plots for the CG, CHG and CHH methylation on promoters of 865 up-regulated genes in *pol2a-1 suvh2 suvh9* compared to WT. (B-C) Correlation analysis of CHH methylation in promoters and expression of 865 up-regulated genes in *pol2a-1 suvh2 suvh9* compared to WT. Genes were divided into 8 quantiles, each of which contains around 108 genes, either according to their fold changes of expression between *pol2a-1 suvh2 suvh9* and WT (D), or according to the methylation changes between WT and *suvh2 suvh9* (E). In both assays, the Pearson's correlation coefficient between methylation changes and expression changes in each quantile is low, ranging from -0.11 to 0.20. Coefficients are represented by red dots designated to the secondary axis.

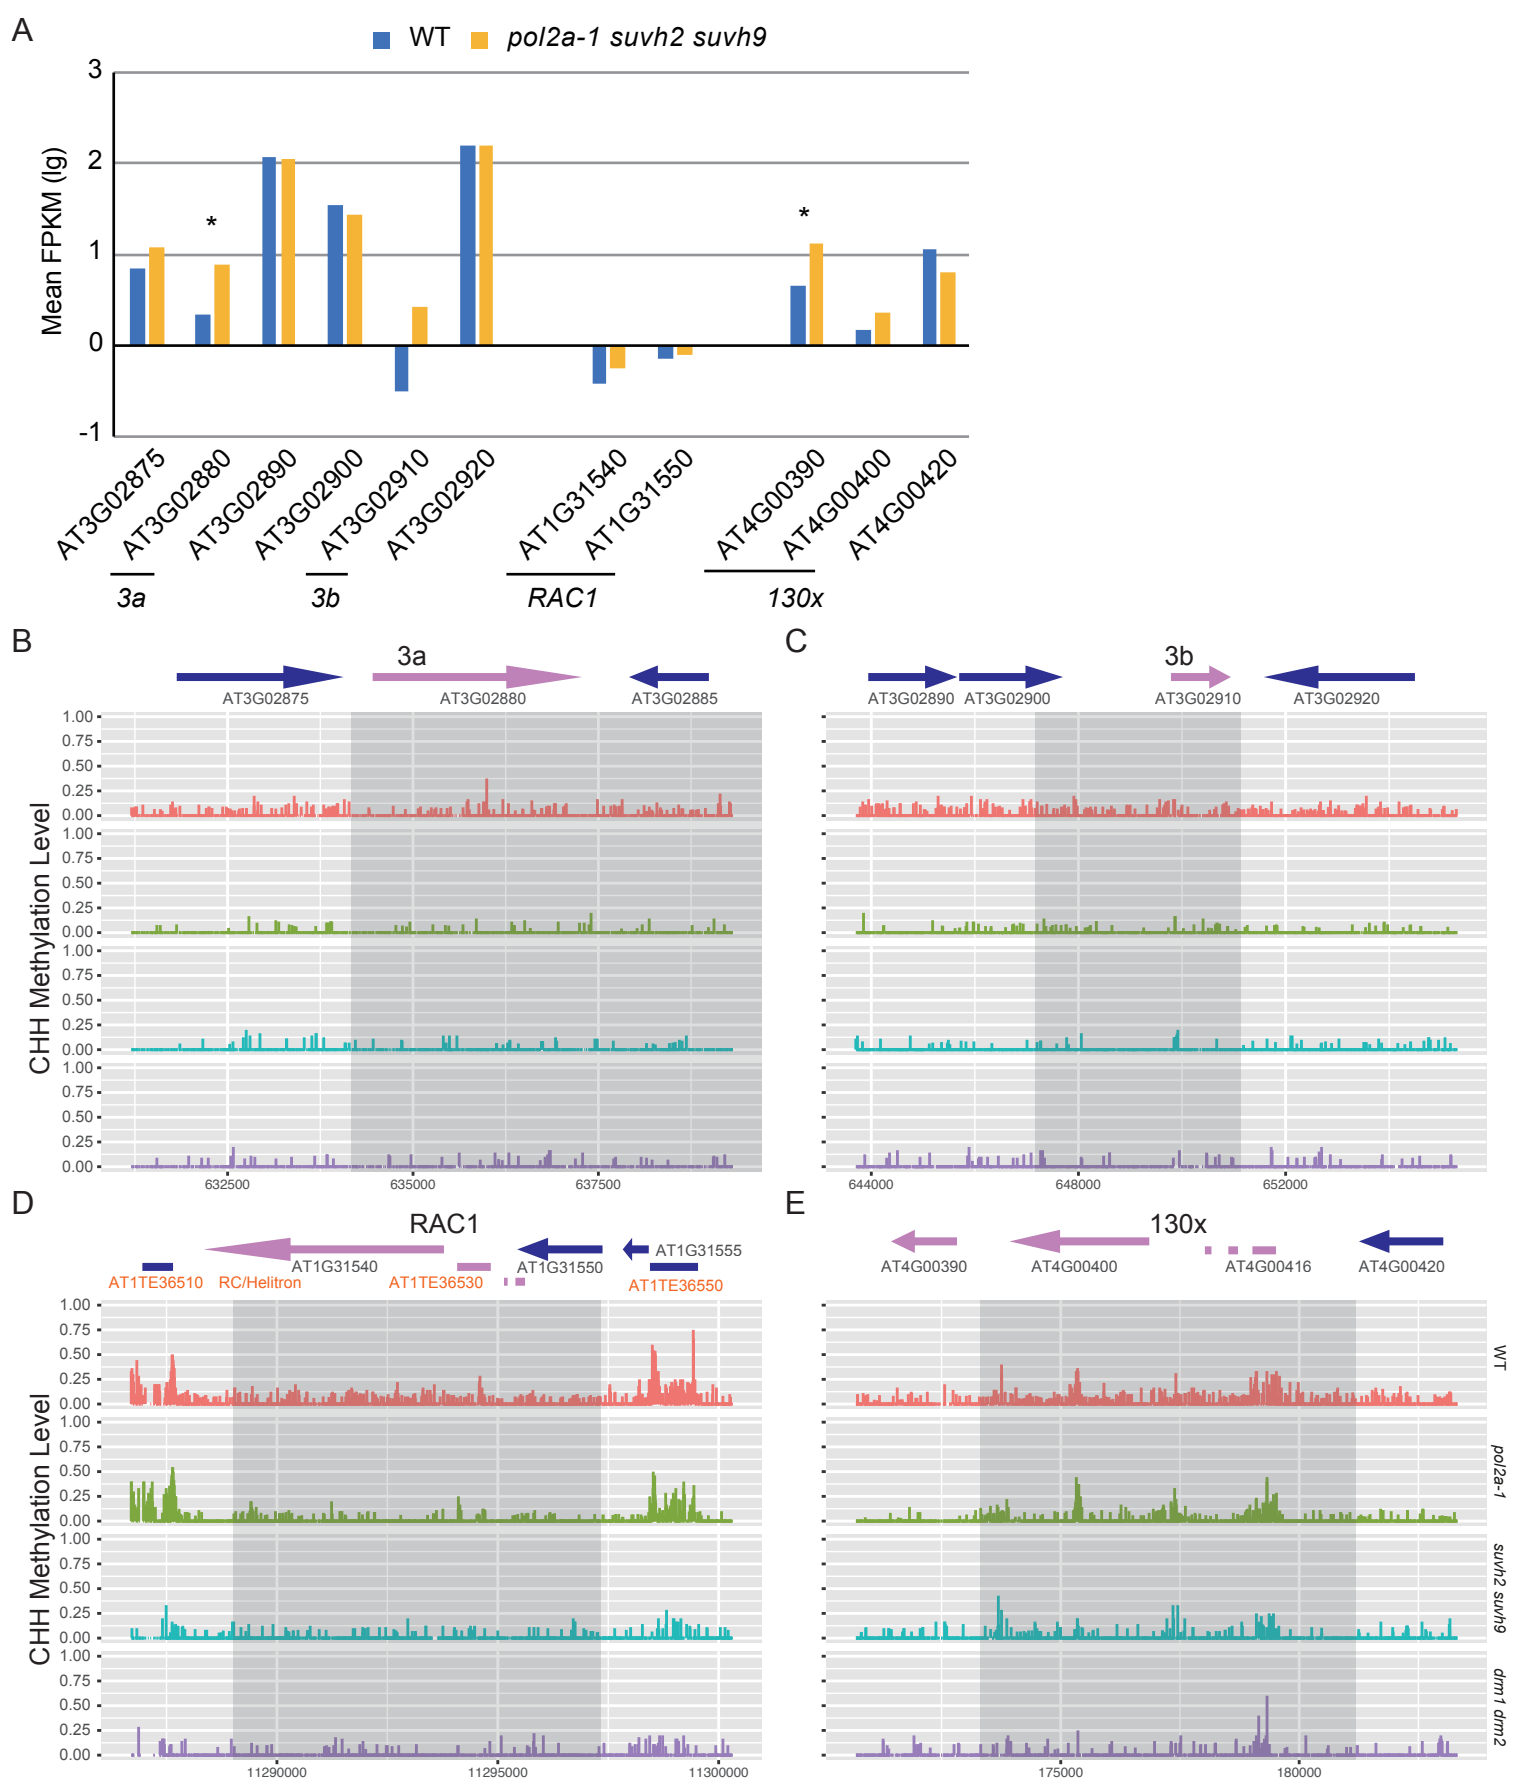

**Fig. S9. The transcript and DNA methylation level of the known recombination hotspots 3a, 3b, RAC1, and 130x in meiocytes of each mutant.**

(A) The RNA transcript levels of the genes within or near the 3a, 3b, RAC1, and 130x regions in meiocytes from *pol2a-1 suvh2 suvh9*, which is known as DSB hotspots. \*:  $P < 0.01$ . AT3G02880 is a gene encoding an NBS-LRR protein, which is commonly associated with DSBs. Genes whose promoters located in hotspots are underlined. (B-E) Snapshots showing CHH methylation at the 3a (B), 3b (C), RAC1 (D), and 130x (E) regions in meiocytes of WT, *pol2a-1*, *suvh2 suvh9* and *drm1 drm2*. Shadow regions refer to the reported DSB hotspots. Gene and TE positions are labelled above plots.

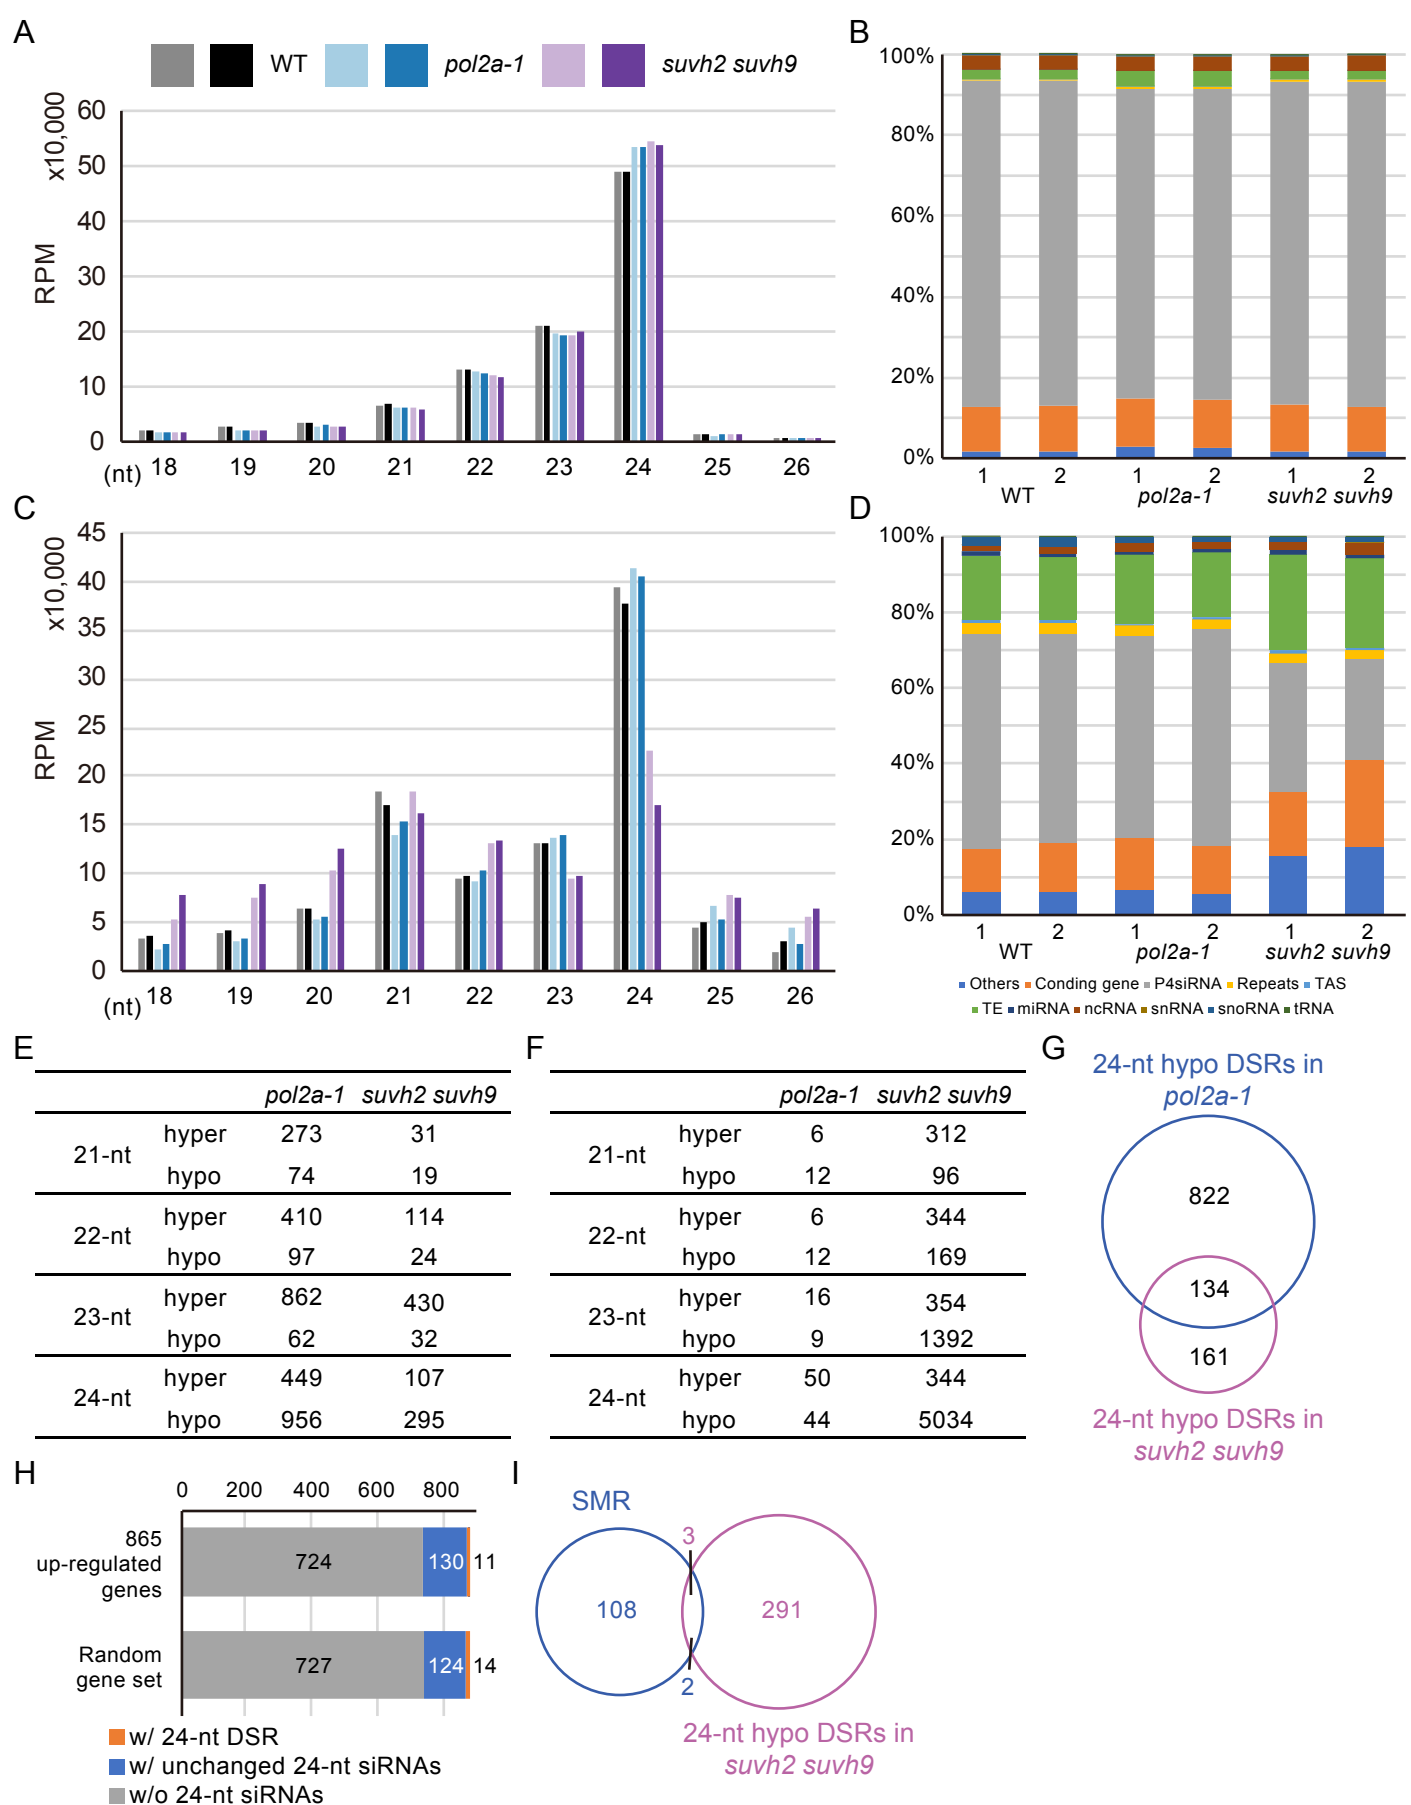

**Fig. S10. Comparison of sRNAs in meiotic cells and seedlings of WT, *pol2a-1* and *suvh2 suvh9***

(A) Size distribution of small RNAs (sRNAs) in meiotic cells of WT, *pol2a-1* and *suvh2 suvh9*. (B) Assigned genomic features of 24-nt siRNAs in meiotic cells of WT, *pol2a-1* and *suvh2 suvh9*. (C) Size distribution of sRNAs in seedlings in WT, *pol2a-1* and *suvh2 suvh9*. (D) Assigned genomic features of 24-nt siRNAs in seedlings of WT, *pol2a-1* and *suvh2 suvh9*. (E-F) Number of 21-24 nt differential siRNA regions (DSRs) in meiotic cells (E) and seedlings (F) of *pol2a-1* and *suvh2 suvh9* compared to WT. (G) Venn diagram showing the overlap between 24-nt hypo DSRs in *pol2a-1* and *suvh2 suvh9* compared to WT, respectively. (H) Number of promoters of 865 up-regulated genes and random gene sets without 24-nt siRNAs, with unchanged 24-nt siRNAs, and with 24-nt hyper/hypo DSRs in *pol2a-1* vs. WT. (I) Venn diagram showing the overlap between SMRs and 24-nt hypo DSRs in *suvh2 suvh9* vs. WT.

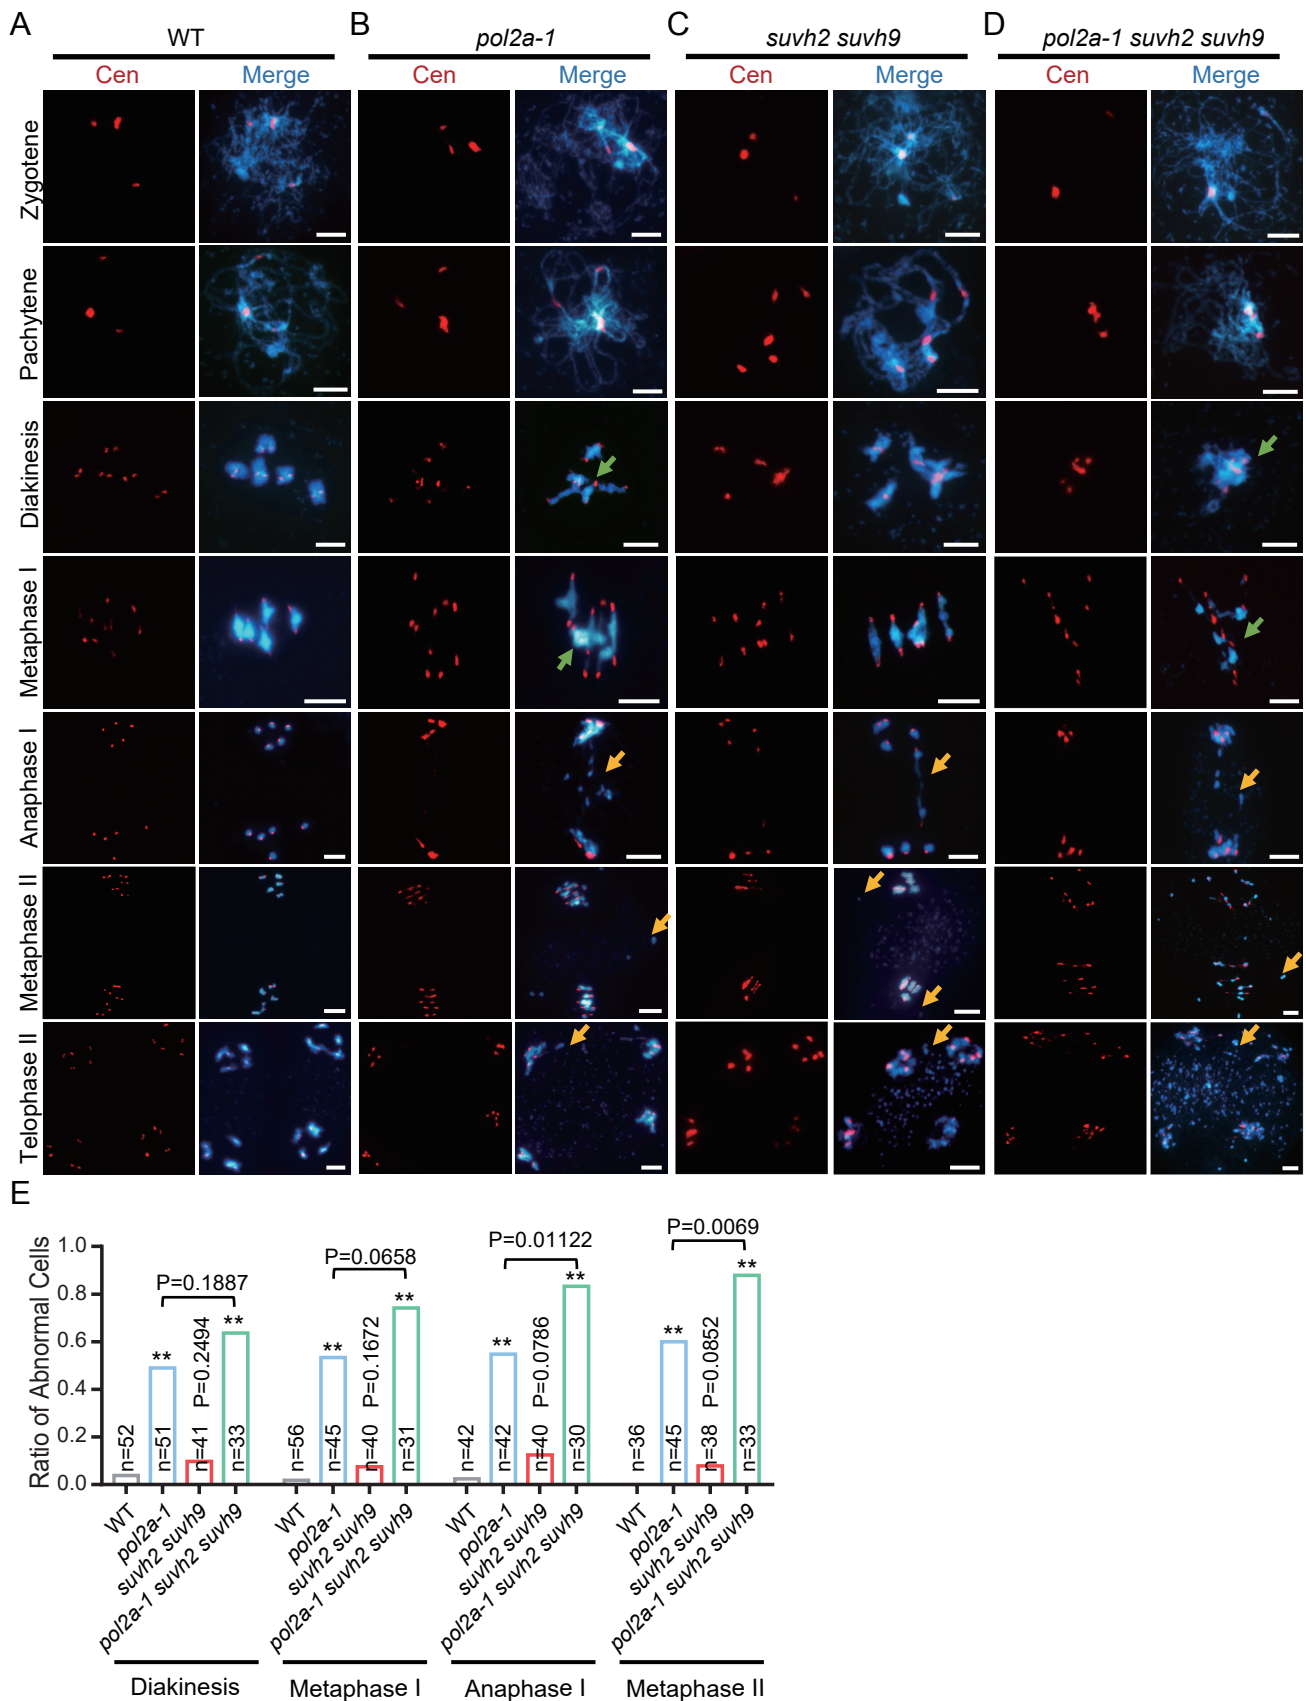

**Fig. S11. Meiotic chromosome morphology in *pol2a-1*, *svh2 svh9*, and *pol2a-1 svh2 svh9***

(A-D) Meiotic chromosome morphology at zygotene, pachytene, diakinesis, metaphase I, anaphase I, metaphase II and telophase II of WT (A), *pol2a-1* (B), *svh2 svh9* (C) and *pol2a-1 svh2 svh9* (D). Green arrows indicate the association of non-homologs, and yellow arrows indicate the chromosomal fragmentations or bridge. Scale bars: 5  $\mu$ m. (E) Bar plots showing ratios of abnormal cells in diakinesis, metaphase I, anaphase I, and metaphase II in WT and mutants. P values refer the comparison between WT and mutants unless specified. \*\*: P < 0.01,  $\chi^2$  test.

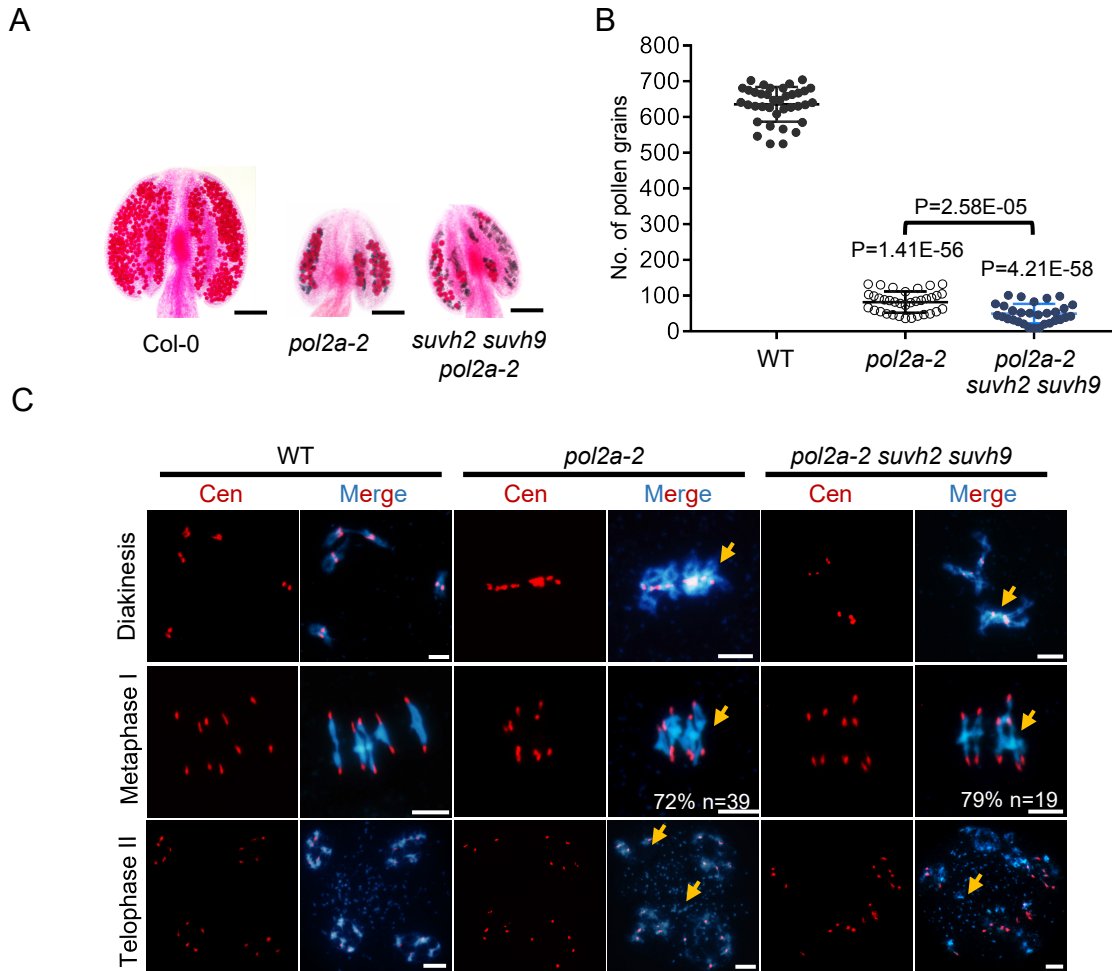

**Fig. S12. The fertility and meiotic phenotypes of *pol2a-2* and *suvh2 suvh9 pol2a-2***  
 (A) Alexander red stained anthers of WT, *pol2a-2*, and *pol2a-2 suvh2 suvh9*. (B) The number of viable pollen grains of WT, *pol2a-2* and *pol2a-2 suvh2 suvh9*. Two-tailed Student's t-test. (C) Meiotic chromosome morphology at diakinesis, metaphase I and telophase II of WT, *pol2a-2*, *suvh2 suvh9* and *pol2a-2 suvh2 suvh9*. Yellow arrows indicate the nonhomology interaction and chromosome fragmentation. Numbers in the bottom right corners indicate the ratio of abnormal cells out of all cells counted. Scale bars: a, 1 mm; c, 5  $\mu$ m. P values refer the comparison between WT and mutants unless specified.

**Table S1. Oligonucleotides, related to Experimental Procedures**

| Oligonucleotide                     | Sequence (5'-3')                              |
|-------------------------------------|-----------------------------------------------|
| <b>Primers for Transgenic Lines</b> |                                               |
| Suvh2pro-LR-F                       | CTATGACATGATTACGAATTCGAGCCTGGTTTTGAGAGAG      |
| Suvh2pro-LR-R                       | GGATCCCCGGGTACCGAGCTCCCTTCCAATGAACCGAAG       |
| SUVH2-Kpn1-F                        | TCCGGTACCATGAGTACATTGTTACCATTTCCTG            |
| SUVH2-SalI-R2                       | ATTGGTCGACGTTGCAGATGGCGAGCTTGC                |
| Suvh9pro-LR-F                       | CTATGACATGATTACGAATTCCTATGAGACGCTTACAGGGGGTTG |
| Suvh9pro-LR-R                       | GGATCCCCGGGTACCGAGCTCTTTTTGCAACGAGAAGCG       |
| SUVH9-BamHI-F                       | TCGGGATCCATGGGTTCTTCTCACATTTCCTCTTG           |
| SUVH9- SalI-R                       | GCGTCGACATTACAAATGGCAAGCTTGGCG                |
| <b>Primers for Yeast Two Hybrid</b> |                                               |
| POL2A-N1-bait-EcoR1-F               | TAAGAATTCAGCGGAGATAATCGAAGACGGGATC            |
| POL2A-N1-bait-Sal1-R                | CGCGTCGACTTTGTTGGGACATAACAACATTTGCCTTG        |
| N1-NT -BamHI-R1                     | CGAGGATCCTCAACGGACTTCTGCGCGTTGAAG             |
| N1-EXO-EcoRI-F2                     | TCCGAATTCGTTTGTGCCTTCGATATAGAGACAAC           |
| POL2A-N2-EcoR1-F                    | TAAGAATTCGCGATGGAAAAGCCCCAGACAAT              |
| POL2A-N2-Sal1-R                     | CGCGTCGACTTTAATGAGTTTCAGCTCCCCTCTACGC         |
| N1-G469R_F1                         | TGAGGTTTTACGTAAAAGGAGTGGCACC                  |
| N1-G469R_R1                         | TTTTACGTAAAACCTCATCAGGGACCAT                  |
| SUVH2-SmaI-F                        | TCCCCGGGGATGAGTACATTGTTACCATTTCCTG            |
| SUVH2-BamHI-R                       | CGGGATCCGTTGCAGATGGCGAGCTTGCC                 |
| SUVH2-a-BamHI-R                     | CGGGATCCTAGAAACACGGGTACATTCTCCTTC             |
| SUVH2-b-SmaI-F                      | TCCCCGGGGGACCTTTCTAACAAGAAGGAGA               |
| SUVH2-c- BamHI -R                   | CGGGATCCACCGTTTCCTTCGATCTGAA                  |
| SUVH9-NdeI-F                        | GTCCATATGATGGGTTCTTCTCACATTTCCTCTTG           |
| SUVH9-BamHI-R                       | TGAGGATCCTTAATTACAAATGGCAAGCTTGGCG            |
| SUVH9-b-NdeI-F                      | GTCCATATGTGCAATGGGAAGGAGAATGTTCTCTG           |
| <b>Primers for BIFC</b>             |                                               |
| N1-BamHI-F                          | TAAGGATCCAGCGGAGATAATCGAAGACGGGAT             |
| N1-SalI-105-R                       | GCGTCGACTCATTGTTGGGACATAACAACATTTGCCT         |
| N1-SalI-103-R                       | GCGTCGACTTTGTTGGGACATAACAACATTTGCCT           |
| N1-NT-SalI-R                        | GCGTCGACCTAACGGACTTCTGCGCGTTGAAG              |
| N1-EXO-BamHI-F                      | TAAGGATCCGTTTGTGCCTTCGATATAGAGACAAC           |
| SUVH2-BamHI-F                       | CGCGGATCCATGAGTACATTGTTACCATTTCCTG            |
| SUVH2-b-BamHI-F2                    | CGCGGATCCGACCTTTCTAACAAGAAGGAGA               |
| SUVH2-SalI-R                        | ATTGGTCGACGTTGCAGATGGCGAGCTTGC                |
| SUVH2-a-103-SalI-R2                 | ATCGGTCGACTAGAAACACGGGTACATTCTCCTTC           |
| SUVH2-SalI-105-R2                   | ATTGGTCGACCTAGTTGCAGATGGCGAGCTTGC             |
| SUVH9-BamHI-103-F                   | TCGGGATCCATGGGTTCTTCTCACATTTCCTCTTG           |
| SUVH9-b-BamHI-103-F                 | CGGGATCCTCGAATGGGAAGGAGAATGTTCTCTG            |
| SUVH9-a- 103-SalI -R                | ATTGGTCGACCTCAGCTGTCCTTCAATCCTCT              |
| SUVH9-103-SalI-R                    | GCGTCGACATTACAAATGGCAAGCTTGGCG                |
| SUVH9-105-SalI-R                    | GCGTCGACCTAATTACAAATGGCAAGCTTGGCG             |



---

**Primers for Pull-down**

---

|                    |                                      |
|--------------------|--------------------------------------|
| N1-BamHI-103-F3    | TAAGGATCCAGCGGAGATAATCGAAGACGGGAT    |
| N1-SalI-105-R3     | GCGTCGACTCATTGTTGGGACATACAACATTTGCCT |
| SUVH2-BamHI-103-F2 | CGCGGATCCATGAGTACATTGTTACCATTTCTG    |
| SUVH2-SalI-R2      | ATTGGTCGACCTAGTTGCAGATGGCGAGCTTGC    |

---

**Primers for genotyping mutant alleles**

---

|                        |                              |
|------------------------|------------------------------|
| pol2a-1-genomic band-F | AAGGTGAATGTCGAGCTAAATTCGCT   |
| pol2a-1-genomic band-R | AAGGTGAATGTCGAGCTAAATTCGCT   |
| pol2a-1-T-DNA band-F   | CTATGGCTCTTTATGGGTTGC        |
| LBb1.3                 | ATTTTGCCGATTTTCGGAAC         |
| pol2a-2-seq-F          | GGTGCATTAATTAGCTATGATACAATCA |
| pol2a-2-seq-R          | CTCGCAGACAATGGCCTCCTACT      |
| hygromycin-F           | CTACACAGCCATCGGTCCAGAC       |
| hygromycin-R           | GGGAGTTTAGCGAGAGCCTGAC       |
| suvh9 genomic band-F   | GTCCTTCAATCCTCTCCAACC        |
| suvh9 T-DNA band-R     | CAAACAAAACCCATTTCTTCG        |
| suvh2 genomic band-F   | CAACTAGCCGAAGAAATGAGG        |
| suvh2 T-DNA band-R     | TACTTCAACCCCTGTGACTGG        |

---

---

**Dataset S1.** Expression and function annotation of 865 up-regulated genes in *pol2a-1 suvh2 suvh9* vs. WT in WT and mutant backgrounds

**Dataset S2.** Expression and function annotation of known genes involved in meiosis in WT and mutant backgrounds
